# Supplementary material for: Updating the list of flower-visiting bees, hoverflies and wasps in the central atolls of Maldives, with notes on land-use effects
Source: Biodivers Data J. 2022 Jun 14;10:e85107. doi: 10.3897/BDJ.10.e85107 (PMC9848504; doi:10.3897/BDJ.10.e85107)
Supplement: Supplementary material 1 — Supplementary Table - Details on haplotypes used in Figure 4. [file bdj-10-e85107-s001.xlsx]

## Sheet: Haoplotype table
Biella P., Ssymank A., Galimberti A., Galli P., Perlik M., Ramazzotti F., Rota A., Tommasi N. Updating the list of flower-visiting bees, hoverflies and wasps in the central atolls of Maldives, with notes on land-use effects. Biodiversity Data Journal
Supplementary Table TS1 - Details on haplotipes used in Figure 4.
BOLD ID	Species	Haplotype	Country (Atoll)
ZPLML001-21	Lasioglossum albescens	LALB01	Maldives (Faafu)
ZPLML002-21	Lasioglossum albescens	LALB01	Maldives (Dhaalu)
ZPLML003-21	Lasioglossum albescens	LALB01	Maldives (Faafu)
ZPLML004-21	Lasioglossum albescens	LALB01	Maldives (Faafu)
ZPLML005-21	Lasioglossum albescens	LALB01	Maldives (Dhaalu)
ZPLML006-21	Lasioglossum albescens	LALB01	Maldives (Dhaalu)
ZPLML007-21	Lasioglossum albescens	LALB01	Maldives (Dhaalu)
ZPLML008-21	Lasioglossum albescens	LALB01	Maldives (Dhaalu)
ZPLML009-21	Lasioglossum albescens	LALB01	Maldives (Dhaalu)
ZPLML010-21	Lasioglossum albescens	LALB01	Maldives (Dhaalu)
ZPLML011-21	Lasioglossum albescens	LALB02	Maldives (Faafu)
ZPLML012-21	Lasioglossum albescens	LALB02	Maldives (Faafu)
ZPLML013-21	Lasioglossum albescens	LALB02	Maldives (Faafu)
ZPLML014-21	Lasioglossum albescens	LALB03	Maldives (Faafu)
ZPLML015-21	Lasioglossum albescens	LALB04	Maldives (Faafu)
ZPLML016-21	Lasioglossum albescens	LALB05	Maldives (Faafu)
ZPLML017-21	Lasioglossum albescens	LALB05	Maldives (Faafu)
ZPLML018-21	Lasioglossum albescens	LALB06	Maldives (Faafu)
ZPLML019-21	Lasioglossum albescens	LALB06	Maldives (Faafu)
ZPLML020-21	Lasioglossum albescens	LALB07	Maldives (Faafu)
ZPLML021-21	Lasioglossum albescens	LALB07	Maldives (Faafu)
ZPLML022-21	Lasioglossum albescens	LALB07	Maldives (Faafu)
ZPLML023-21	Lasioglossum albescens	LALB08	Maldives (Faafu)
ZPLML084-21	Lasioglossum albescens	LALB09	Maldives (Faafu)
GMBCC2128_15	Lasioglossum albescens	LALB19	Bangladesh
GMBCC2155_15	Lasioglossum albescens	LALB20	Bangladesh
MAMTJ063_12_KY845697	Lasioglossum albescens	LALB21	Pakistan
MAMTL028_12_KY833208	Lasioglossum albescens	LALB22	Pakistan
PMNHA012_14_KY839719	Lasioglossum albescens	LALB23	Pakistan
PMNHA013_14_KY843521	Lasioglossum albescens	LALB24	Pakistan
PMNHB009_14_KY842676	Lasioglossum albescens	LALB22	Pakistan
PMNHI161_15_KY831984	Lasioglossum albescens	LALB25	Pakistan
PMNHI163_15_KY837289	Lasioglossum albescens	LALB26	Pakistan
PMNHJ159_15_KY842288	Lasioglossum albescens	LALB22	Pakistan
PMNHN418_15_KY846763	Lasioglossum albescens	LALB21	Pakistan
BCA129-12	Xylocopa fenestrata	XFEN1	Pakistan
BOWGF629-09	Xylocopa fenestrata	XFEN2	Oman
GBMNB63212-20	Xylocopa fenestrata	XFEN2	India
MAHYM006-10	Xylocopa fenestrata	XFEN2	Pakistan
MAHYM008-10	Xylocopa fenestrata	XFEN2	Pakistan
MAHYM009-10	Xylocopa fenestrata	XFEN2	Pakistan
MAHYM010-10	Xylocopa fenestrata	XFEN2	Pakistan
MAHYM011-10	Xylocopa fenestrata	XFEN2	Pakistan
MAHYM573-11	Xylocopa fenestrata	XFEN2	Pakistan
MAHYM859-12	Xylocopa fenestrata	XFEN2	Pakistan
MAIMB104-09	Xylocopa fenestrata	XFEN2	Pakistan
MAIMB105-09	Xylocopa fenestrata	XFEN2	Pakistan
MAIMB106-09	Xylocopa fenestrata	XFEN2	Pakistan
MAPOL014-10	Xylocopa fenestrata	XFEN2	Pakistan
POPIN007-19	Xylocopa fenestrata	XFEN2	India
MAHYM007-10	Xylocopa fenestrata	XFEN3	Pakistan
MAHYM574-11	Xylocopa fenestrata	XFEN4	Pakistan
ZPLML067-21	Xylocopa fenestrata	XFEN5	Maldives (Faafu)
ZPLML068-21	Xylocopa fenestrata	XFEN5	Maldives (Faafu)
ZPLML069-21	Xylocopa fenestrata	XFEN5	Maldives (Dhaalu)
ZPLML070-21	Xylocopa fenestrata	XFEN5	Maldives (Faafu)
ZPLML076-21	Megachile laticeps	MLAT1	Maldives (Dhaalu)
ZPLML077-21	Megachile laticeps	MLAT2	Maldives (Dhaalu)
ZPLML078-21	Megachile laticeps	MLAT3	Maldives (Faafu)
ZPLML079-21	Megachile laticeps	MLAT3	Maldives (Faafu)
BOFTH594-10	Megachile laticeps	MLAT4	Thailand
BOFTH652-10	Megachile laticeps	MLAT4	Thailand
BOFWI036-11	Megachile laticeps	MLAT4	Vietnam
BOWGF336-09	Megachile laticeps	MLAT4	Vietnam
COFC253-10	Megachile laticeps	MLAT4	Thailand
GBMNE1714-21	Megachile laticeps	MLAT4	India
GBMNE1715-21	Megachile laticeps	MLAT4	India
SABEE249-15	Megachile laticeps	MLAT4	Malaysia
SABEE252-15	Megachile laticeps	MLAT4	Malaysia
SABEE253-15	Megachile laticeps	MLAT4	Malaysia
SABEE254-15	Megachile laticeps	MLAT4	Malaysia
SABEE255-15	Megachile laticeps	MLAT4	Malaysia
SABEE262-15	Megachile laticeps	MLAT4	Malaysia
SABEE291-15	Megachile laticeps	MLAT4	Malaysia
SABEE432-15	Megachile laticeps	MLAT4	Malaysia
SABEE742-15	Megachile laticeps	MLAT4	Thailand
SABEE749-15	Megachile laticeps	MLAT4	Thailand
SABEE785-15	Megachile laticeps	MLAT4	Thailand
MSAPB1049-12	Megachile laticeps	MLAT5	Samoa
MSAPB1051-12	Megachile laticeps	MLAT5	Samoa
MSAPB1052-12	Megachile laticeps	MLAT5	Samoa
MSAPB1053-12	Megachile laticeps	MLAT5	Samoa
MSAPB1054-12	Megachile laticeps	MLAT5	Samoa
MSAPB1055-12	Megachile laticeps	MLAT5	Samoa
MSAPB1058-12	Megachile laticeps	MLAT5	Samoa
MSAPB1063-12	Megachile laticeps	MLAT5	Samoa
MSAPB1064-12	Megachile laticeps	MLAT5	Samoa
MSAPB1071-12	Megachile laticeps	MLAT5	Samoa
MSAPB1073-12	Megachile laticeps	MLAT5	Samoa
MSAPB1077-12	Megachile laticeps	MLAT5	Samoa
MSAPB1078-12	Megachile laticeps	MLAT5	Samoa
MSAPB1079-12	Megachile laticeps	MLAT5	Samoa
MSAPB1081-12	Megachile laticeps	MLAT5	Samoa
MSAPB1082-12	Megachile laticeps	MLAT5	Samoa
MSAPB599-11	Megachile laticeps	MLAT6	Vanatu
MSAPB601-11	Megachile laticeps	MLAT6	Vanatu
MSAPB606-11	Megachile laticeps	MLAT6	Vanatu
MSAPB607-11	Megachile laticeps	MLAT6	Vanatu
MSAPB621-11	Megachile laticeps	MLAT6	Vanatu
MSAPB641-11	Megachile laticeps	MLAT6	Vanatu
MSAPB658-11	Megachile laticeps	MLAT6	Vanatu
MSAPB673-11	Megachile laticeps	MLAT6	Vanatu
MSAPB674-11	Megachile laticeps	MLAT6	Vanatu
MSAPB675-11	Megachile laticeps	MLAT6	Vanatu
MSAPB676-11	Megachile laticeps	MLAT6	Vanatu
MSAPB735-11	Megachile laticeps	MLAT6	Vanatu
MSAPB775-11	Megachile laticeps	MLAT6	Vanatu
MSAPB776-11	Megachile laticeps	MLAT6	Vanatu
MSAPB782-11	Megachile laticeps	MLAT6	Vanatu
MSAPB783-11	Megachile laticeps	MLAT6	Vanatu
MSAPB787-11	Megachile laticeps	MLAT6	Vanatu
MSAPB788-11	Megachile laticeps	MLAT6	Vanatu
MSAPB789-11	Megachile laticeps	MLAT6	Vanatu
MSAPB790-11	Megachile laticeps	MLAT6	Vanatu
MSAPB792-11	Megachile laticeps	MLAT6	Vanatu
SABEE638-15	Megachile laticeps	MLAT7	Malaysia
ZPLML059-21	Polistes olivaceus	POLI1	Maldives (Faafu)
GBMIN19375-13	Polistes olivaceus	POLI2	Bangladesh
GBMIN19376-13	Polistes olivaceus	POLI3	Bangladesh
GBMIN19377-13	Polistes olivaceus	POLI4	Bangladesh
GBMIN19378-13	Polistes olivaceus	POLI5	Bangladesh
GBMIN19379-13	Polistes olivaceus	POLI6	Bangladesh
GBMIN19380-13	Polistes olivaceus	POLI7	Bangladesh
GBMIN19381-13	Polistes olivaceus	POLI7	Bangladesh
GBMIN19396-13	Polistes olivaceus	POLI7	Bangladesh
GBMIN19397-13	Polistes olivaceus	POLI7	Bangladesh
GBMIN19382-13	Polistes olivaceus	POLI8	Bangladesh
GBMIN19383-13	Polistes olivaceus	POLI9	Bangladesh
GBMIN19384-13	Polistes olivaceus	POLI9	Bangladesh
GBMIN19386-13	Polistes olivaceus	POLI9	Bangladesh
GBMIN19398-13	Polistes olivaceus	POLI9	Bangladesh
GBMIN19399-13	Polistes olivaceus	POLI9	Bangladesh
NZHYM1261-11	Polistes olivaceus	POLI9	Vanatu
GBMIN19385-13	Polistes olivaceus	POLI10	Bangladesh
GBMIN19390-13	Polistes olivaceus	POLI11	Bangladesh
GBMIN19391-13	Polistes olivaceus	POLI12	Bangladesh
GBMIN19392-13	Polistes olivaceus	POLI13	Bangladesh
GBMIN19393-13	Polistes olivaceus	POLI14	Bangladesh
GBMIN19394-13	Polistes olivaceus	POLI15	Bangladesh
GBMIN19395-13	Polistes olivaceus	POLI16	Bangladesh
GBMIN19400-13	Polistes olivaceus	POLI17	Bangladesh
GBMIN19401-13	Polistes olivaceus	POLI18	Bangladesh
GBMIN19402-13	Polistes olivaceus	POLI19	Bangladesh
GBMNB60996-20	Polistes olivaceus	POLI20	India
GBMNB60997-20	Polistes olivaceus	POLI20	India
GMBCD3187-15	Polistes olivaceus	POLI21	Bangladesh
GMBCN291-15	Polistes olivaceus	POLI21	Bangladesh
GMBCF3478-15	Polistes olivaceus	POLI22	Bangladesh
GMBCF3479-15	Polistes olivaceus	POLI22	Bangladesh
GMBCF3481-15	Polistes olivaceus	POLI22	Bangladesh
GMBCN290-15	Polistes olivaceus	POLI22	Bangladesh
GMBCN293-15	Polistes olivaceus	POLI22	Bangladesh
GMBCF3480-15	Polistes olivaceus	POLI23	Bangladesh
GMBCG124-15	Polistes olivaceus	POLI24	Bangladesh
GMBCG125-15	Polistes olivaceus	POLI24	Bangladesh
GMBCG127-15	Polistes olivaceus	POLI24	Bangladesh
GMBCN295-15	Polistes olivaceus	POLI24	Bangladesh
GMBCH3770-15	Polistes olivaceus	POLI25	Bangladesh
GMBCN289-15	Polistes olivaceus	POLI25	Bangladesh
ZPLML093-21	Paragus serratus	PSER1	Maldives (Faafu)
ZPLML094-21	Paragus serratus	PSER1	Maldives (Faafu)
ZPLML095-21	Paragus serratus	PSER1	Maldives (Faafu)
CNCDB2883-11	Paragus serratus	PSER1	India
CNCDB2884-11	Paragus serratus	PSER1	India
MAIMB346-09	Paragus serratus	PSER1	Pakistan
MAMTF011-12	Paragus serratus	PSER1	Pakistan
MAMTH068-12	Paragus serratus	PSER1	Pakistan
MAMTK231-12	Paragus serratus	PSER1	Pakistan
MAMTL581-12	Paragus serratus	PSER1	Pakistan
MAMTM356-13	Paragus serratus	PSER1	Pakistan
PMNHB291-15	Paragus serratus	PSER1	Pakistan
PMNHD1167-15	Paragus serratus	PSER1	Pakistan
GMBCA4882-15	Paragus serratus	PSER2	Bangladesh
GMBCA5187-15	Paragus serratus	PSER2	Bangladesh
GMBCB2532-15	Paragus serratus	PSER2	Bangladesh
GMBCC1646-15	Paragus serratus	PSER2	Bangladesh
GMBCC1949-15	Paragus serratus	PSER2	Bangladesh
GMBCC1992-15	Paragus serratus	PSER2	Bangladesh
GMBCD1398-15	Paragus serratus	PSER2	Bangladesh
GMBCE1969-15	Paragus serratus	PSER2	Bangladesh
GMBCI1211-15	Paragus serratus	PSER2	Bangladesh
GMBCI337-15	Paragus serratus	PSER2	Bangladesh
GMBCI4487-15	Paragus serratus	PSER2	Bangladesh
GMBCJ2672-15	Paragus serratus	PSER2	Bangladesh
GMBCM2772-15	Paragus serratus	PSER2	Bangladesh
GMBCM3244-15	Paragus serratus	PSER2	Bangladesh
GMBCM3388-15	Paragus serratus	PSER2	Bangladesh
GMBCM3499-15	Paragus serratus	PSER2	Bangladesh
GMBCN026-15	Paragus serratus	PSER2	Bangladesh
GMMBI028-16	Paragus serratus	PSER2	Malaysia
GMMBI040-16	Paragus serratus	PSER2	Malaysia
SYROC281-15	Paragus serratus	PSER2	Thailand
MAMTF049-12	Paragus serratus	PSER4	Pakistan
PMNHA042-14	Paragus serratus	PSER5	Pakistan
ZPLML107-21	Eristalinus laetus	ELAE1	Maldives (Dhaalu)
ZPLML108-21	Eristalinus laetus	ELAE1	Maldives (Dhaalu)
ZPLML109-21	Eristalinus laetus	ELAE1	Maldives (Dhaalu)
ZPLML110-21	Eristalinus laetus	ELAE1	Maldives (Dhaalu)
ZPLML111-21	Eristalinus laetus	ELAE1	Maldives (Dhaalu)
MADIP007-10	Eristalinus laetus	ELAE1	Pakistan
MADIP009-10	Eristalinus laetus	ELAE1	Pakistan
MADIP015-10	Eristalinus laetus	ELAE1	Pakistan
MADIP023-10	Eristalinus laetus	ELAE1	Pakistan
MAMTO615-14	Eristalinus laetus	ELAE1	Pakistan
MAMTO616-14	Eristalinus laetus	ELAE1	Pakistan
MAMTT203-14	Eristalinus laetus	ELAE1	Pakistan
MAMTV147-14	Eristalinus laetus	ELAE1	Pakistan
MAMTW449-14	Eristalinus laetus	ELAE1	Pakistan
MAMTW450-14	Eristalinus laetus	ELAE1	Pakistan
MAMTW451-14	Eristalinus laetus	ELAE1	Pakistan
MAMTW452-14	Eristalinus laetus	ELAE1	Pakistan
MAMTW453-14	Eristalinus laetus	ELAE1	Pakistan
MAMTW458-14	Eristalinus laetus	ELAE1	Pakistan
MAMTW459-14	Eristalinus laetus	ELAE1	Pakistan
MAMTY302-14	Eristalinus laetus	ELAE1	Pakistan
PMNHE214-15	Eristalinus laetus	ELAE1	Pakistan
PMNHF422-15	Eristalinus laetus	ELAE1	Pakistan
PMNHJ143-15	Eristalinus laetus	ELAE1	Pakistan
PMNHJ146-15	Eristalinus laetus	ELAE1	Pakistan
PMNHJ147-15	Eristalinus laetus	ELAE1	Pakistan
PMNHJ149-15	Eristalinus laetus	ELAE1	Pakistan
PMNHK011-15	Eristalinus laetus	ELAE1	Pakistan
PMNHL005-15	Eristalinus laetus	ELAE1	Pakistan
PMNHL006-15	Eristalinus laetus	ELAE1	Pakistan
PMNHL007-15	Eristalinus laetus	ELAE1	Pakistan
PMNHL010-15	Eristalinus laetus	ELAE1	Pakistan
PMNHL011-15	Eristalinus laetus	ELAE1	Pakistan
PMNHL019-15	Eristalinus laetus	ELAE1	Pakistan
PMNHL020-15	Eristalinus laetus	ELAE1	Pakistan
PMNHM002-15	Eristalinus laetus	ELAE1	Pakistan
PMNHM003-15	Eristalinus laetus	ELAE1	Pakistan
PMNHM005-15	Eristalinus laetus	ELAE1	Pakistan
MADIP008-10	Eristalinus laetus	ELAE2	Pakistan
MADIP013-10	Eristalinus laetus	ELAE3	Pakistan
MADIP014-10	Eristalinus laetus	ELAE4	Pakistan
MADIP024-10	Eristalinus laetus	ELAE5	Pakistan
MADIP025-10	Eristalinus laetus	ELAE5	Pakistan
MAMTO614-14	Eristalinus laetus	ELAE5	Pakistan
MAMTY312-14	Eristalinus laetus	ELAE5	Pakistan
PMNHL015-15	Eristalinus laetus	ELAE5	Pakistan
PMNHN388-15	Eristalinus laetus	ELAE5	Pakistan
PMNHN401-15	Eristalinus laetus	ELAE5	Pakistan
MAMTT202-14	Eristalinus laetus	ELAE6	Pakistan
MAMTW456-14	Eristalinus laetus	ELAE7	Pakistan
MAMTW457-14	Eristalinus laetus	ELAE8	Pakistan
MAMTW460-14	Eristalinus laetus	ELAE9	Pakistan
MAMTX208-14	Eristalinus laetus	ELAE10	Pakistan
PMNHN396-15	Eristalinus laetus	ELAE10	Pakistan
MAMTY305-14	Eristalinus laetus	ELAE11	Pakistan
MAMTY306-14	Eristalinus laetus	ELAE12	Pakistan
PMNHJ145-15	Eristalinus laetus	ELAE13	Pakistan
PMNHN404-15	Eristalinus laetus	ELAE13	Pakistan
PMNHJ148-15	Eristalinus laetus	ELAE14	Pakistan
PMNHL022-15	Eristalinus laetus	ELAE15	Pakistan
PMNHL023-15	Eristalinus laetus	ELAE16	Pakistan
PMNHN378-15	Eristalinus laetus	ELAE17	Pakistan
PMNHN380-15	Eristalinus laetus	ELAE18	Pakistan
PMNHN385-15	Eristalinus laetus	ELAE19	Pakistan
PMNHN397-15	Eristalinus laetus	ELAE20	Pakistan
PMNHN407-15	Eristalinus laetus	ELAE21	Pakistan
